# Supplementary material
Source: PubMed Central journal article supplement (PMC2646148)
Supplement: emboj2008286s1.pdf [file emboj2008286s1.pdf]

## Supplemental Data

### Figure S1

Phyl mediates down regulation of Dl in the wing imaginal disc and in the mid pupal eye disc.

(A) Wild type third instar wing disc showing the expression of Dl (red). In the wing pouch Dl is expressed in two stripes straddling the D/V boundary (arrow).

(B-C) *phyl* mutant clones (non-green in C) in the wing imaginal disc were generated using *Ubx-flp*.

(B) Dl expression (red) in a third instar wing imaginal disc containing *phyl* mutant clones.

(C) Merged panel shows an increase in the levels of Dl in cells at the D/V boundary that are mutant for *phyl* (arrow).

(D) Wild type mid pupal eye disc showing weak expression of Dl (red) at the apical tips of the ommatidial clusters.

(E-F) *phyl* mutant clones (non-green in F) in the mid-pupal eye disc.

(E) Dl expression (red) in a mid-pupal eye disc containing *phyl* mutant clones.

(F) Merged panel shows an increase in the levels of Dl in cells that are mutant for *phyl*.

### Figure S2

(A-I) Expression of activated Ci, pMAD and activated MAPK in *phyl* mutant cells in third instar eye disc. GFP marks wild-type cells and non-GFP cells are mutant for *phyl*. Arrows mark the morphogenetic furrow.

Wild-type expression of activated Ci (**A**), pMAD (**D**) and activated MAPK (**G**) in third instar eye discs are shown as controls.

**(B-C)** Expression of activated Ci (red, **B**) in *phyl* mutant clones (non-green in **C**). The merged panel (**C**) shows no difference in Ci expression in *phyl* mutant cells compared with adjacent wild type cells.

**(E-F)** Expression of activated pMAD (red **E**) in *phyl* mutant clones. The merged panel (**F**) shows no increase in the levels of PMAD in *phyl* mutant cells.

**(H-I)** Expression of activated MAPK (red, **H**) in *phyl* mutant clones. The merged panel (**I**) shows no increase in the levels of activated MAPK in *phyl* mutant cells.

**(J-O)** Localization of EGFR and PVR in *phyl* mutant cells in third instar eye disc. GFP marks wild-type cells and non-GFP cells are mutant for *phyl*.

**(J-L)** In an eye disc containing *phyl* mutant clone (non-green **J, L**). The localization of EGFR (red, **K**) in mutant cells is similar to that seen in the adjacent wild-type cells. The merged panel is shown in (**L**).

**(M-O)** In an eye disc containing *phyl* mutant clone (non-green, **M**). The localization of PVR (red, **N**) in mutant cells is similar to that seen in the adjacent wild-type cells. The merged panel is shown in (**O**).

### **Figure S3**

Phyl mediates down regulation of Wg in the third instar wing and antennal discs.

**(A)** Wild-type expression of Wg in the third instar wing pouch showing expression at the D/V boundary (arrow)

**(B)** Expression of Wg in the third instar wing pouch containing *phyl* mutant clones.

Clones mutant for *phyl* were generated using *Ubx-flp*. GFP (green) marks the wild type cells and non-GFP cells are mutant for *phyl* showing increased levels of Wg in *phyl* mutant tissue.

(C) Wild type expression of Wg in the third instar antennal disc.

(D) Expression of Wg in the third instar antennal disc containing *phyl* mutant clones.

Clones mutant for *phyl* were generated using *hs-flp*. GFP (green) marks the wild-type cells and non-GFP cells are mutant for *phyl* showing increased levels of Wg in *phyl* mutant tissue.

#### Figure S4

Expression of different endosomal markers in *phyl* mutant tissue in the third instar eye disc.

*phyl* mutant clones were generated using *ey-flp*. Green marks the wild-type tissue and non green tissue is mutant for *phyl*.

(A-C) In *phyl* mutant cells (non-green in C), N<sup>intra</sup> (red, A) co-localizes with Avl (blue, B) which marks early endosomes. The merged panel is shown in (C).

(D-F) In *phyl* mutant cells (non-green in F), N<sup>intra</sup> (red, D) co-localizes with Dor (blue, E) which marks early endosomes. The merged panel is shown in (F).

(G-I) In *phyl* mutant cells (non-green in I), N<sup>intra</sup> (red, G) does not co-localize with Hook (blue, H) which marks late endosomes. The merged panel is shown in (I).

(J-L) endocytic N<sup>intra</sup> in *phyl* mutant tissue is ubiquitinated.

*phyl* mutant clones in the eye disc (non- green in **L**) were co-stained for N<sup>intra</sup> (red, **J**) and antibody directed against poly-ubiquitin epitope (blue, **K**). The merged panel (**L**) shows co-localization of N<sup>intra</sup> and poly-Ubi.

**(M-O)**. endocytic vesicles in *phyl* mutant tissue are positive for LysoTracker Red staining.

In the third instar eye disc, *phyl* mutant tissue (non-green, **M**) exhibit positive LysoTracker Red staining for endocytic vesicles (red, **N**). The merged panel is shown in **(O)**.

**(P-Q)** In *phyl* mutant clones (non-green in **R**), DI (red, **P**) does not co-localize with Rab11 (blue, **Q**) which marks the recycling endosomes. The merged panel is show non-overlapping vesicles (arrows) **(R)**.

## Figure S5

Elevated levels of DI and N<sup>intra</sup> in *phyl* mutant cells is independent of Tamtrack function in third instar eye discs. Arrows mark the morphogenetic furrow.

**(A-C)** Expression of Tamtrack in *wild-type* (**A**), *GMR-ttk* (**B**) and *sev-ttk* (**C**).

**(D-F)** Expression of DI in *wild-type* (**D**), *GMR-ttk* (**E**) and *sev-ttk* (**F**) showing that over-expression of TTK in cells behind the furrow does not cause an increase in the levels of DI or mislocalization of DI.

**(G-I)** Expression of N<sup>intra</sup> in *wild-type* (**G**), *GMR-ttk* (**H**) and *sev-ttk* (**I**) showing over-expression of TTK in cells behind the furrow does not cause an increase in the levels of N<sup>intra</sup>.

**(J-O)** Expression of DI (**J-L**) and N<sup>intra</sup> (**M-O**) in *sina* mutant cells in third instar eye discs. Wild-type cells are marked with GFP (green) and non-GFP cells are mutant for

*sina*. The merged panels **L** and **O** show normal expression and localization of Dl and N<sup>intra</sup> in *sina* mutant cells.

**(P-S)** Localization of N<sup>intra</sup> (red) in cells doubly mutant for *phyl* and *ttk*. Cells negative for GFP (green) and  $\beta$ -Gal (blue) are doubly mutant for *phyl* and *ttk* (outlined by white dotted line). The merged panel (**S**) shows vesicular N<sup>intra</sup> in cells that are mutant for both *phyl* and *ttk* (arrows).

**(T-V)** Expression of Wg in *sina*<sup>A16</sup> mutant clones in the third instar eye disc. Wild type cells are marked with GFP (green, **T**) and non-GFP cells are mutant for *sina*. The merged panel (**V**) shows normal expression and levels of Wg in *sina* mutant tissue.

### **Figure S6**

**(A)**. Dl expression (green) in wild type third instar eye disc showing down regulation of Dl protein by column 8 behind the furrow. Arrow marks the position of the morphogenetic furrow.

**(B)** *elav-gal4 UAS-Dl* third instar eye disc stained for Dl. In this background, Dl continues to be expressed beyond column 8 behind the furrow. Arrow marks the position of the morphogenetic furrow.

### **Figure S7**

Expression of Wg in the third instar eye disc containing *EGFR*<sup>ts</sup> mutant clones.

*EGFR*<sup>ts</sup> clones in the third instar eye disc generated using *eye-flp* (**A**, non-green) was stained for Wg (**B**). The merged panel (**C**) shows the accumulation of Wg in endocytic

vesicles only in the mutant tissue. A high magnification view of the panels is shown in **D**, **E** and **F**.

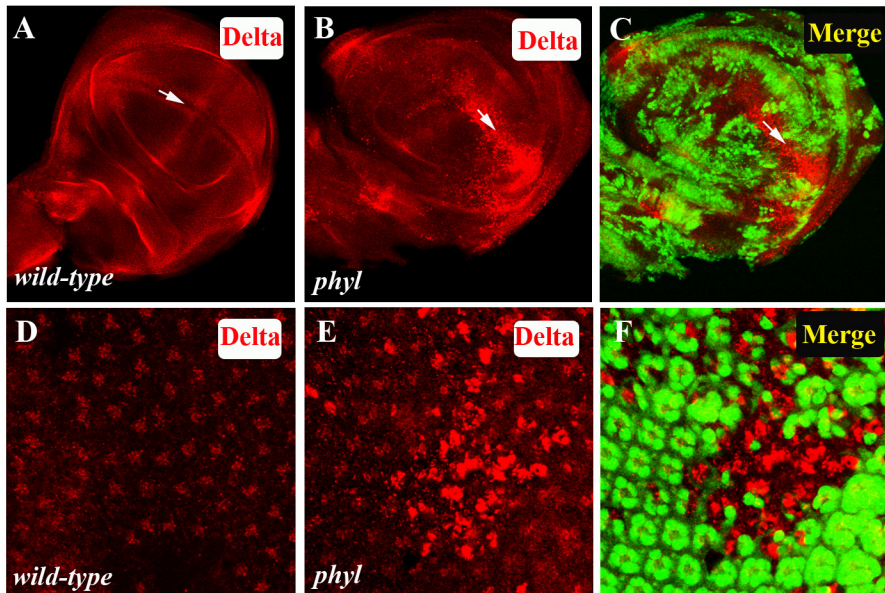

**Fig S1**

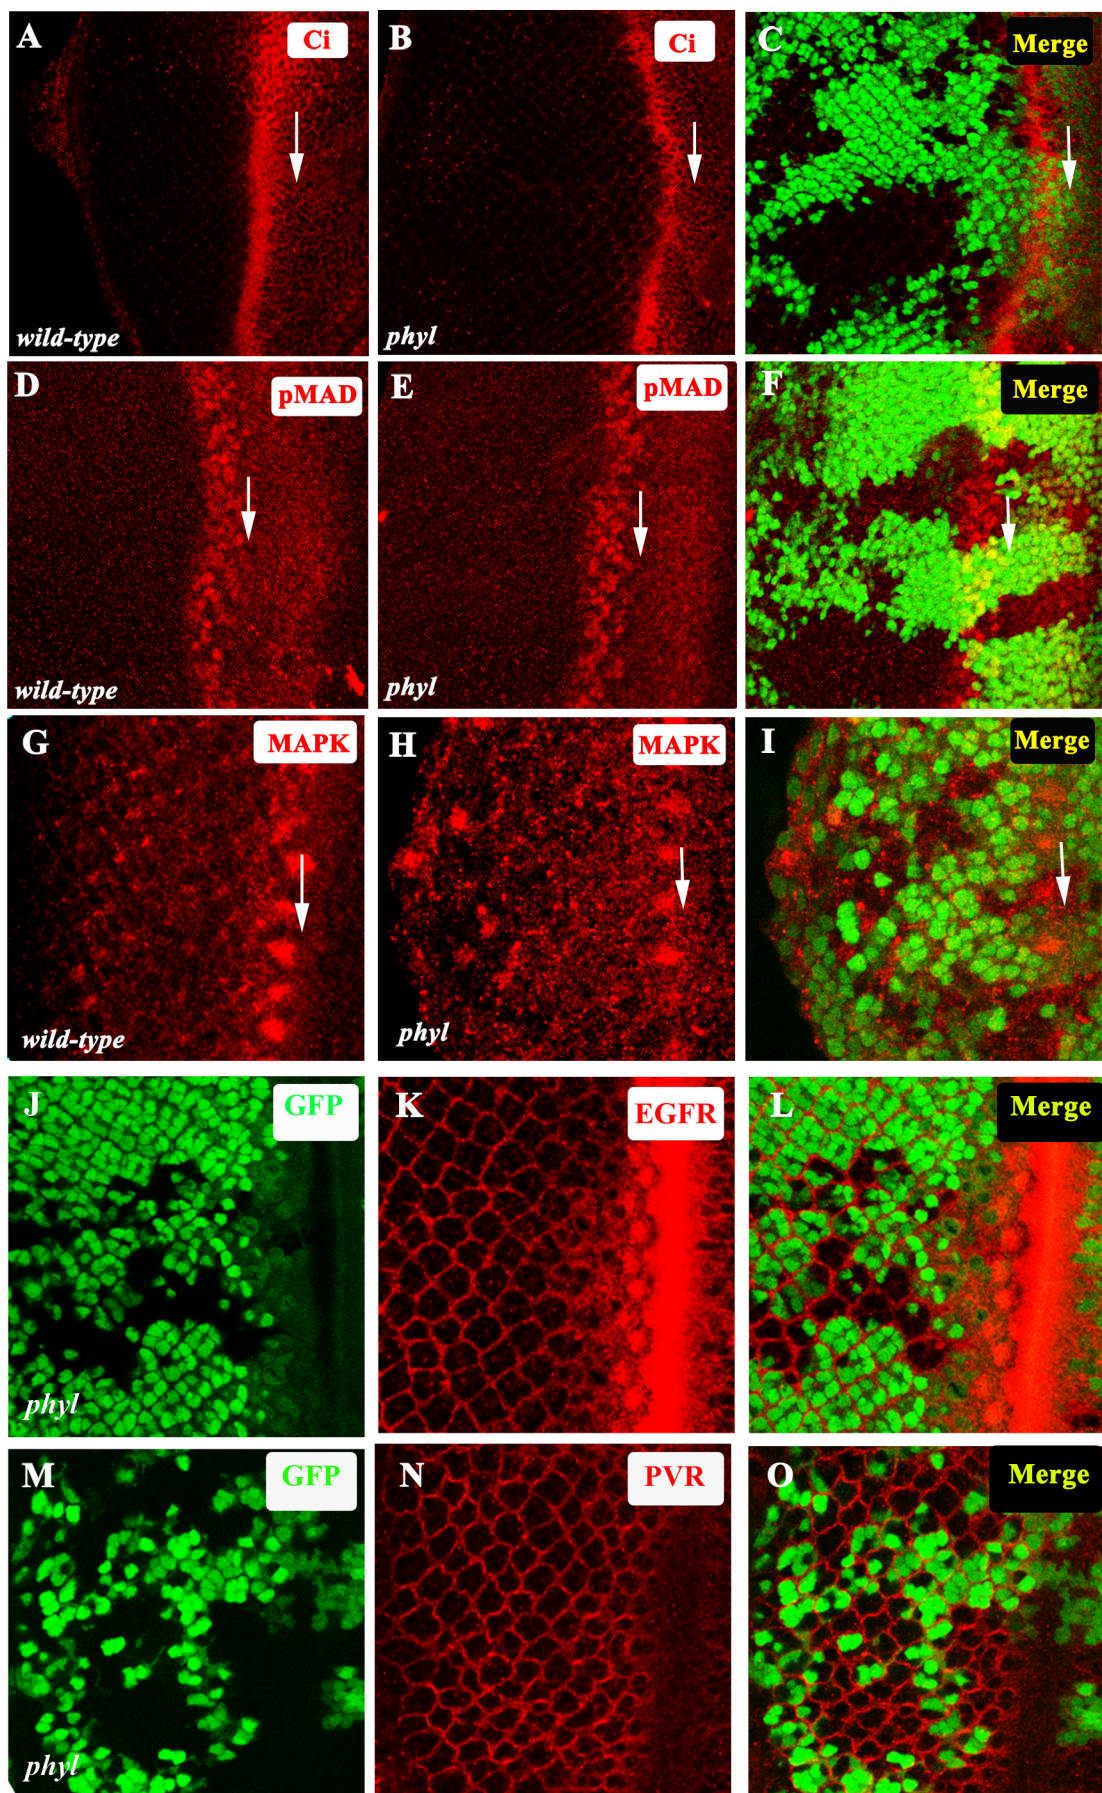

**Fig S2**



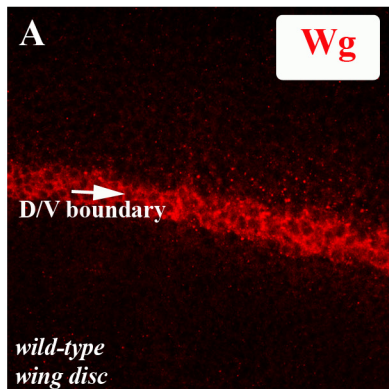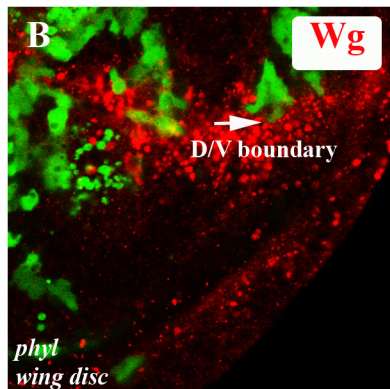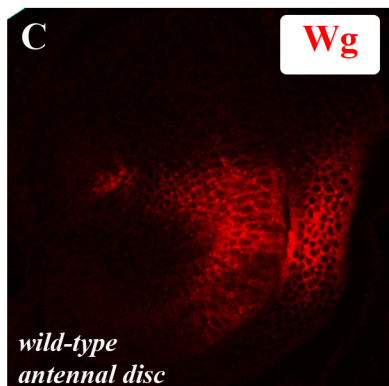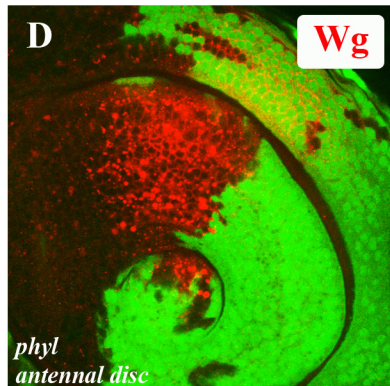

**Fig S3**

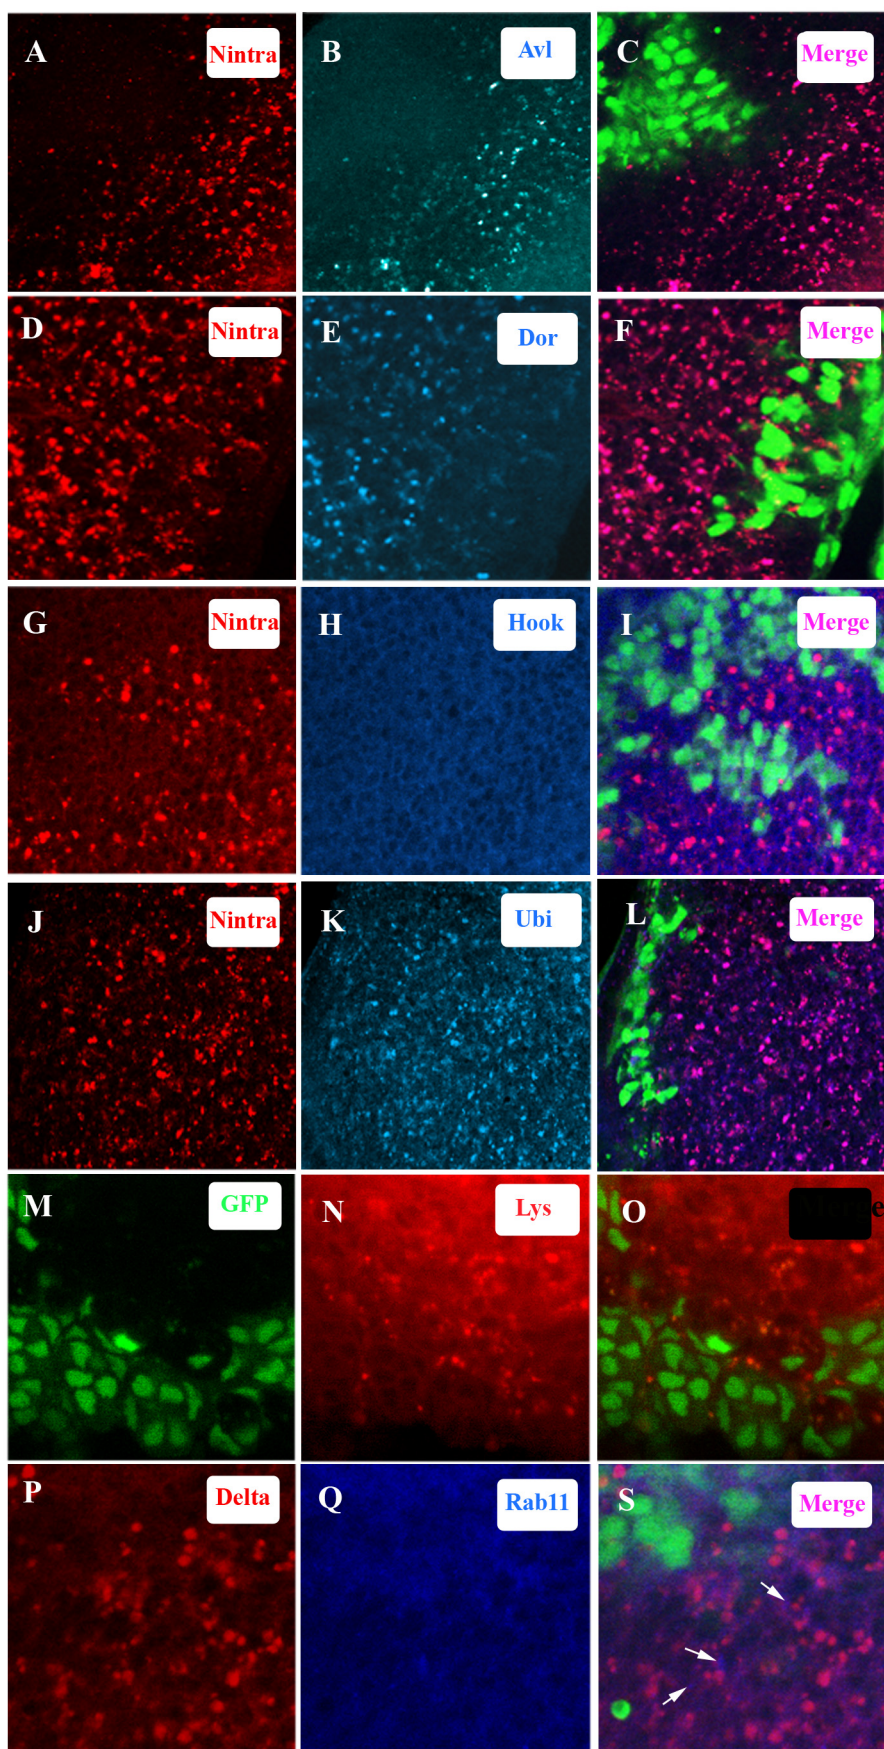

SFig 4

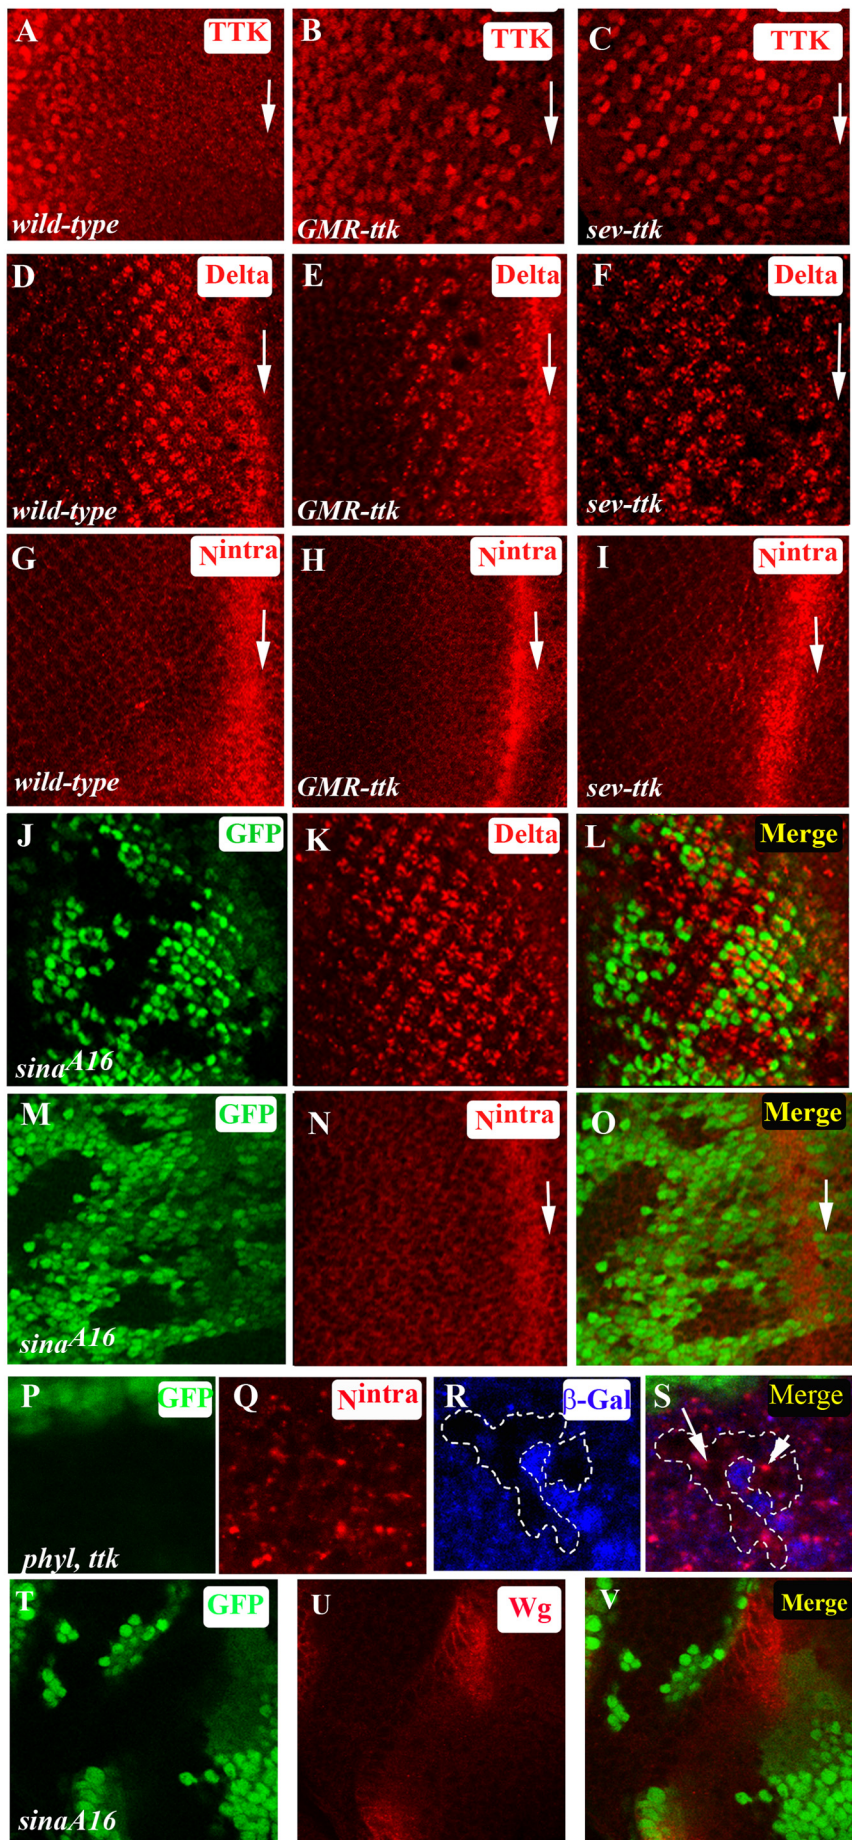

Fig S5

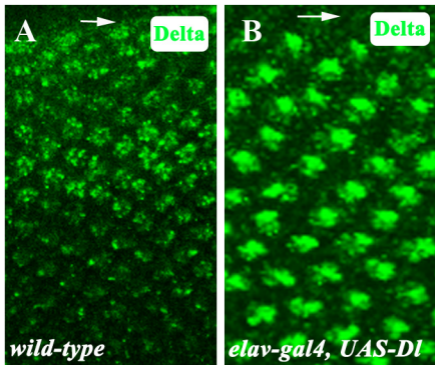

**Fig. S6**

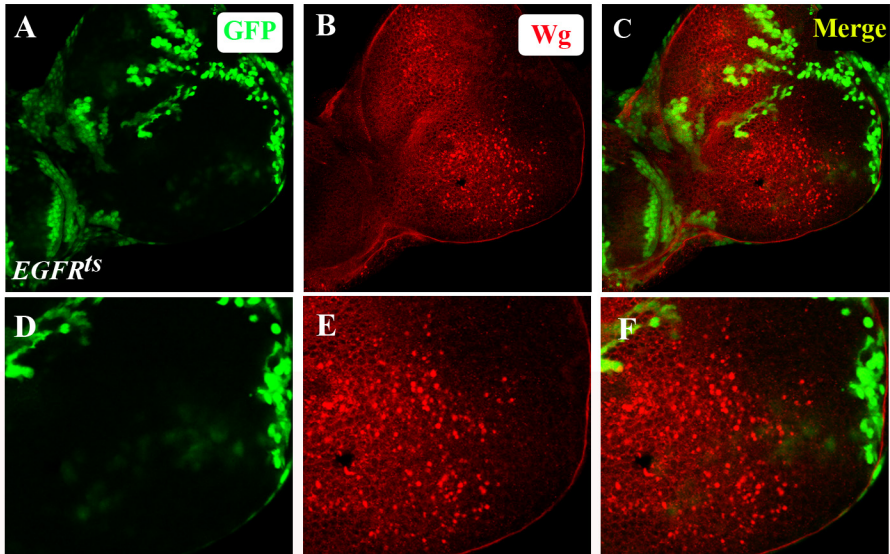

Fig S7
